# Supplementary material
Source: PubMed Central journal article supplement (PMC3873636)
Supplement: NIHMS497575-supplement-Supp_Fig_S1-S4.pdf [file NIHMS497575-supplement-Supp_Fig_S1-S4.pdf]

## Supplementary Figure S1

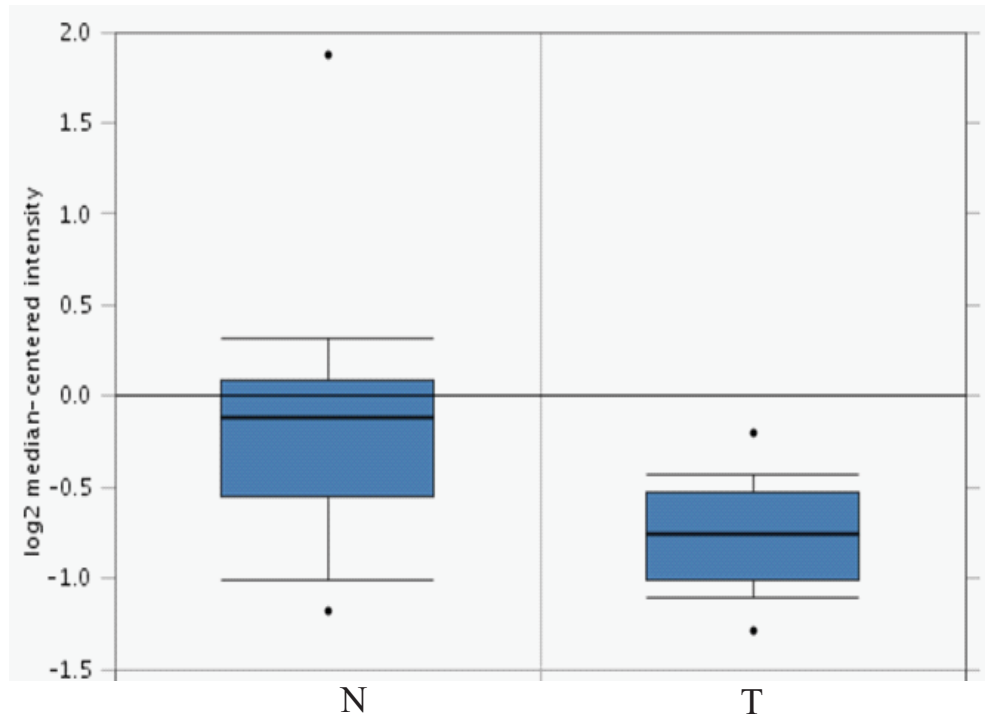

Expression of core 3 synthase in paired normal pancreas (N; n=39) and Pancreatic Ductal Adenocarcinoma (T; n=39) was extracted from deposited gene expression data sets (n=36 patients, 3 patients were analyzed in duplicates) (Badea et al., *Hepato-Gastroenterology* 2008; 55:2015-2026), analyzed in oncoPrint and presented as box and whisker plots. Core 3 synthase expression was down regulated in tumor specimens compared to normal pancreas. The log2 median-centered intensity for normal and tumor specimen is (-0.0115) and (-0.758), respectively. OncoPrint™ (Compendia Bioscience, Ann Arbor, MI) was used for analysis and visualization.

**a**

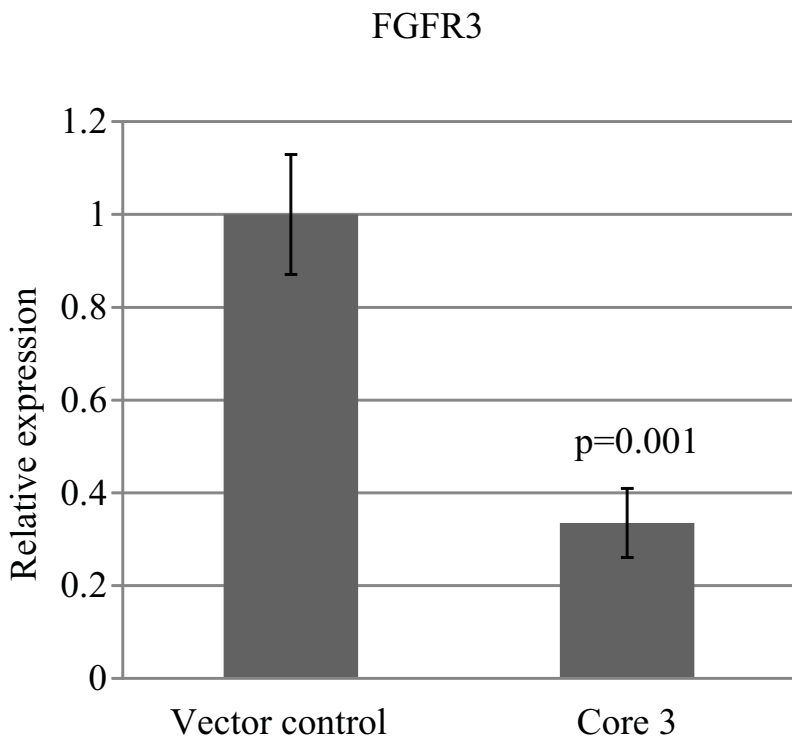

**b**

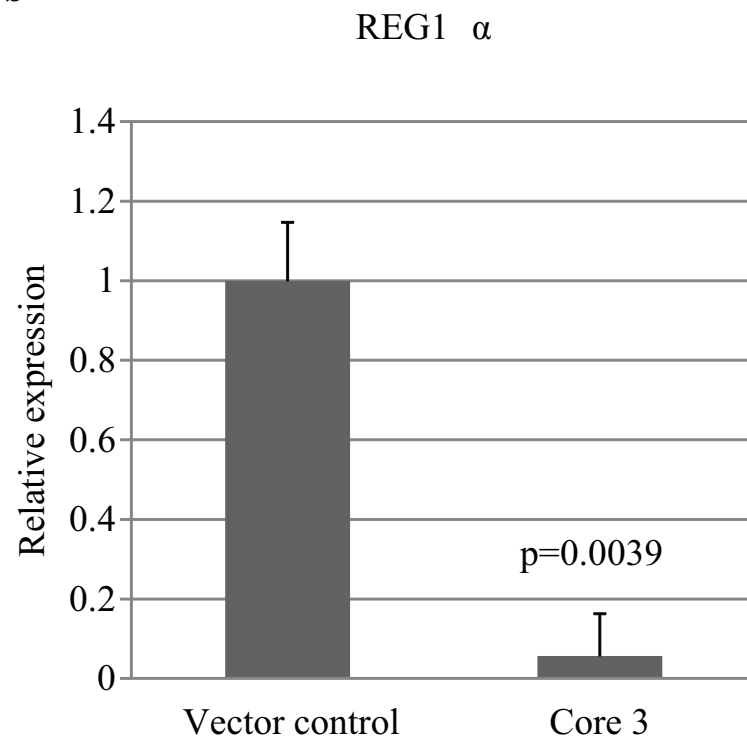

Core 3 synthase downregulates FGFR3 and REG1 $\alpha$ . Real-time PCR analysis of FGFR3 (b) and REG1 $\alpha$  (b) expression in core 3 synthase and vector control expressing FG cells. The values are the average of the three experimental means obtained and error bars represents S.D of mean. A p-value less than 0.05 was considered to be statistically significant.

Vector control

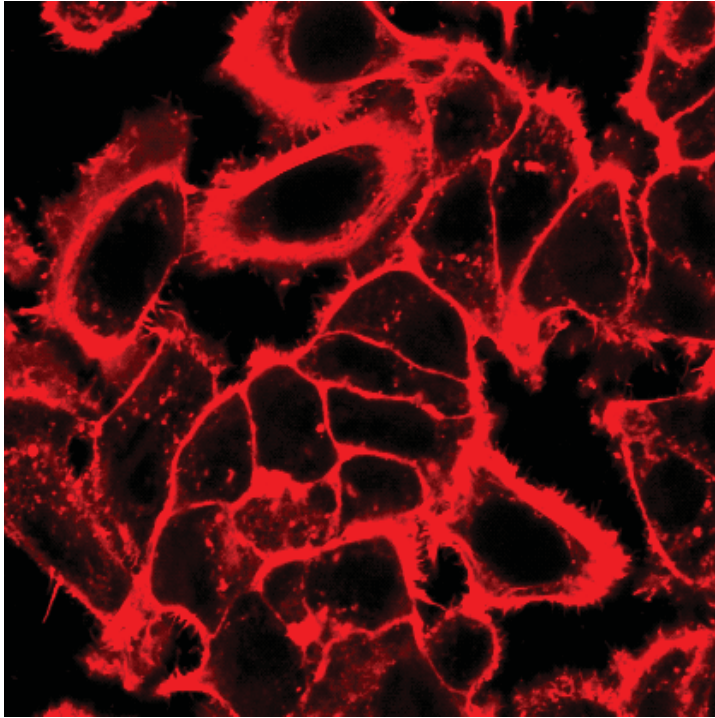

Core 3

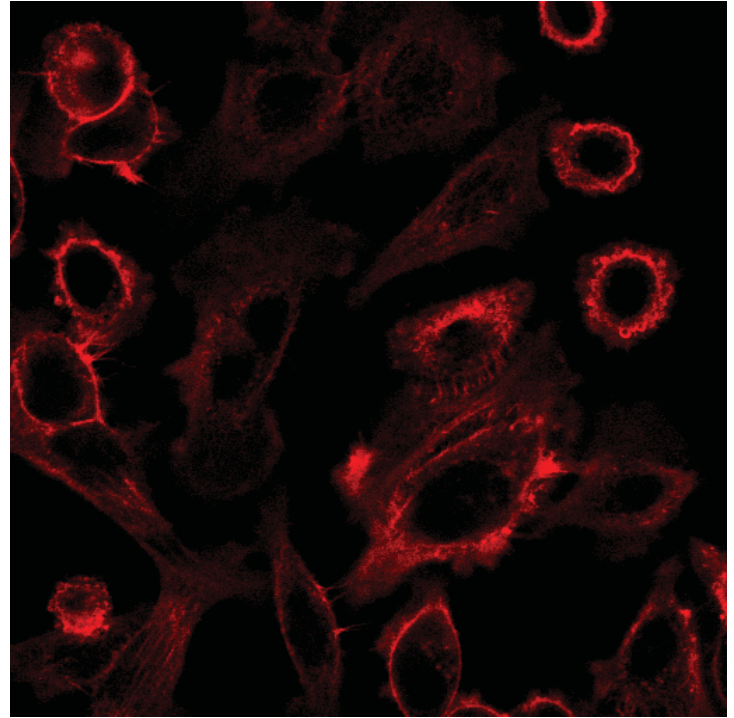

Core 3 and vector control FG cells were stained with Rhodamine conjugated Phalloidin for detection of F-actin polymerization. Core 3 expressing FG cells show reduced Phalloidin staining intensity.

## Supplementary Figure S4

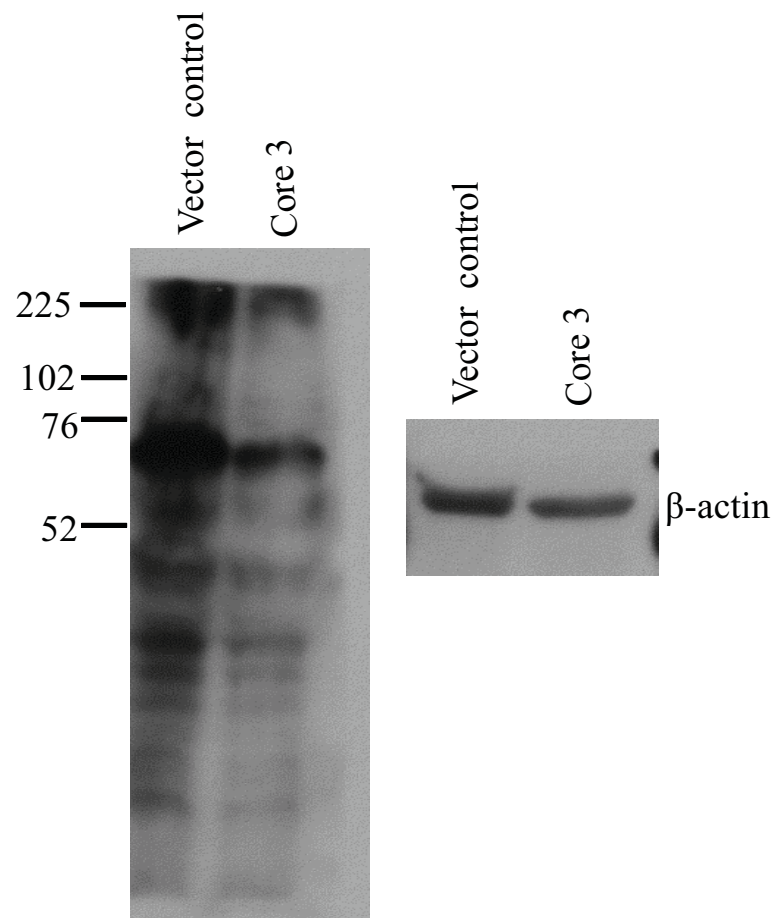

FG cell lysates (control or expressing core 3) were treated with neuraminidase (Millipore, Billerica, MA, USA) and then western blotted with T-antigen specific monoclonal antibody 3C9 (a kind gift from Dr. Henrik Clausen, Department of Cellular and Molecular Medicine, University of Copenhagen, Denmark). We observed decreased T antigen expression in core 3 synthase expressing cells compared to vector control cells.  $\beta$ -actin is used as internal control.
